1 **TITLE: A multiplex microsphere IgG assay for SARS-CoV-2 using ACE2-mediated inhibition as a**  
2 **surrogate for neutralization**

3 **AUTHORS**

4 Andrew Cameron<sup>1</sup>, Claire A. Porterfield<sup>2</sup>, Larry D. Byron<sup>1</sup>, Jiong Wang<sup>3</sup>, Zachary Pearson<sup>1</sup>,  
5 Jessica L. Bohrhunter<sup>1</sup>, Anthony B. Cardillo<sup>2</sup>, Lindsay Ryan-Muntz<sup>1</sup>, Ryan A. Sorensen<sup>1</sup>, Mary T.  
6 Caserta<sup>4,5</sup>, Steven Angeloni<sup>6</sup>, Dwight J. Hardy<sup>1,7</sup>, Martin S. Zand<sup>3</sup>, Nicole D. Pecora<sup>1,7</sup>

7 **AFFILIATIONS**

8 <sup>1</sup> University of Rochester Medical Center, Clinical Microbiology, Department of Pathology and  
9 Laboratory Medicine, Rochester, NY, 14623.

10 <sup>2</sup> University of Rochester Medical Center, Department of Pathology and Laboratory Medicine,  
11 Rochester, NY, 14623.

12 <sup>3</sup> University of Rochester Medical Center, Department of Medicine, Nephrology, Rochester, NY,  
13 14642.

14 <sup>4</sup> University of Rochester Medical Center, Department of Pediatrics, Rochester, NY, 14642.

15 <sup>5</sup> University of Rochester Medical Center, Department of Medicine, Infectious Diseases,  
16 Rochester, NY, 14642.

17 <sup>6</sup> Luminex Corporation, Austin, TX, 78727.

18 <sup>7</sup> University of Rochester Medical Center, Department of Microbiology and Immunology,  
19 Rochester, NY, 14642.

20 **RUNNING TITLE**

21 SARS-CoV-2 multi-antigen serological profiling

22

23 **ABSTRACT**

24 The COVID-19 pandemic has highlighted the challenges inherent to the serological detection of  
25 a novel pathogen such as SARS-CoV-2. Serological tests can be used diagnostically and for  
26 surveillance, but their usefulness depends on their throughput, sensitivity and specificity. Here,  
27 we describe a multiplex fluorescent microsphere-based assay, 3Flex, that can detect antibodies  
28 to three major SARS-CoV-2 antigens—spike (S) protein, the spike ACE2 receptor-binding domain  
29 (RBD), and nucleocapsid (NP). Specificity was assessed using 213 pre-pandemic samples.  
30 Sensitivity was measured and compared to the Abbott™ ARCHITECT™ SARS-CoV-2 IgG assay  
31 using serum samples from 125 unique patients equally binned ( $n = 25$ ) into 5 time intervals ( $\leq 5$ ,  
32 6 to 10, 11 to 15, 16 to 20, and  $\geq 21$  days from symptom onset). With samples obtained at  $\leq 5$   
33 days from symptom onset, the 3Flex assay was more sensitive (48.0% vs. 32.0%), but the two  
34 assays performed comparably using serum obtained  $\geq 21$  days from symptom onset. A larger  
35 collection ( $n = 534$ ) of discarded sera was profiled from patients ( $n = 140$ ) whose COVID-19  
36 course was characterized through chart review. This revealed the relative rise, peak (S, 23.8;  
37 RBD, 23.6; NP, 16.7; in days from symptom onset), and decline of the antibody response.  
38 Considerable interperson variation was observed with a subset of extensively sampled ICU  
39 patients. Using soluble ACE2, inhibition of antibody binding was demonstrated for S and RBD,  
40 and not for NP. Taken together, this study described the performance of an assay built on a  
41 flexible and high-throughput serological platform that proved adaptable to the emergence of a  
42 novel infectious agent.

## 43 INTRODUCTION

44

45 The  $\beta$ -coronavirus SARS-CoV-2 is the causative agent of the coronavirus disease 2019 (COVID-19)  
46 pandemic. As SARS-CoV-2 continues to move through the global population, serological testing  
47 is vitally important to understand both the degree of spread (seroprevalence) and the  
48 characteristics of the immune response in terms of antibody kinetics, dominant antigens, and  
49 immunological significance.

50

51 A number of antibody tests have been granted emergency use authorization (EUA) by the FDA <sup>1</sup>.  
52 These include rapid lateral flow devices (LFAs), enzyme-linked immunoassays (ELISAs),  
53 chemiluminescent immunoassays (CMIA), and fluorescence microsphere immunoassays  
54 (FMIA). The majority of these tests are qualitative and typically target either the SARS-CoV-2  
55 spike (S) or nucleocapsid (NP) proteins. Likewise, these same targets were of interest in the  
56 development of serological assays for SARS-CoV-1 <sup>2-6</sup>.

57

58 The S protein is a ~180 kDa glycosylated homotrimer that extends from the viral surface and  
59 initiates host cell entry <sup>7</sup>. The extracellular region of S is organized into S1 and S2, with S1  
60 comprising the outermost region and containing the receptor binding domain (RBD) for the  
61 human ACE2 receptor <sup>8-11</sup>. Anti-S antibodies can neutralize SARS-CoV-2 in cell culture <sup>7,8,12-15</sup>, as  
62 can anti-S antibodies against SARS-CoV-1 <sup>3</sup>. Thus, S and RBD are of great interest as targets for  
63 both immunoassays and vaccines due to their interactions with the human host <sup>16</sup>. As a  
64 component of serological assays, S is incorporated as either the full extracellular domain (ECD),

65 the outermost S1 domain, or the receptor-binding domain (RBD). Additionally, the abundance  
66 and antigenicity of NP have made it an attractive target for both diagnostic and vaccine work <sup>17-</sup>  
67 <sup>19</sup>. NP has roles in viral replication, transcription, and packaging of the viral genome <sup>20,21</sup>.

68  
69 Beyond exposure, questions surrounding the serological response to SARS-CoV-2 are becoming  
70 more nuanced, and include long-term antibody kinetics, measuring anamnestic responses to  
71 reinfection or vaccination, and assessment of plasma donors. For these, both qualitative and  
72 quantitative/semi-quantitative serological assays that target multiple antigens and/or have the  
73 ability to assess the neutralization potential of SARS-CoV-2 antibodies are of great interest. To  
74 date, only a handful of assays with FDA EUA incorporate both the NP and S antigens, including  
75 technologies such as LFAs (e.g. Assure COVID-19 IgG/IgM Rapid Test Device, CareStart COVID-19  
76 IgM/IgG, Cellex qSARS-CoV-2 IgG/IgM Rapid Test), CLIAs (e.g. Diazyme DZ-Lite SARS-CoV-2  
77 IgM/IgG, Vibrant COVID-19 Ab Assay), and FMIA (Luminex Inc. xMAP SARS-CoV-2 Multi-  
78 Antigen IgG Assay) <sup>1</sup>. None of the current EUA assays incorporate an assessment of antibody-  
79 mediated neutralization of SARS-CoV-2 S protein binding to the ACE2 receptor.

80  
81 In the current study, we utilized a laboratory-developed FMIA designated SARS-CoV-2 IgG 3Flex  
82 (3Flex) built on the Luminex FLEXMAP 3D<sup>®</sup> system for the simultaneous detection of antibodies  
83 to the N, S, and RBD antigens. We assessed its performance using 534 serum samples from 140  
84 SARS-CoV-2-infected individuals from both inpatient and outpatient settings. In addition, we  
85 followed the serological response in a subset of individuals over time, and demonstrated

86 longitudinal patterns of antibody levels to each antigen alongside an assessment of  
87 neutralization at different time points over the course of disease.

88

## 89 **MATERIALS AND METHODS**

90

### 91 **Clinical laboratory setting**

92

93 The UR Medicine Labs clinical microbiology laboratory in Rochester, NY provides diagnostic  
94 services for institutionalized and ambulatory patients (serving several area hospitals, practices,  
95 nursing homes, and urgent care providers). During the ongoing COVID-19 global pandemic,  
96 diagnostic analyses for SARS-CoV-2 were provided for an expanded patient population in  
97 Western NY. This study was approved by the University of Rochester Institutional Review Board  
98 (RSRB STUDY00004836).

99

### 100 **Sample collection**

101

102 Residual serum specimens ( $n = 534$ ) were collected at convenience in April 2020 from 140  
103 unique patients (including outpatients, nursing home residents, and inpatients). All serum  
104 specimens were obtained from symptomatic patients positive for SARS-CoV-2 nucleic acid  
105 tested with RT-PCR-based assays (cobas® SARS-CoV-2 Test, Simplexa™ COVID-19 Direct, and  
106 Xpert® Xpress SARS-CoV-2). Serum was held at 4°C until discard (7 days) or -80°C for long-term  
107 storage. Additionally, pre-COVID-19 sera ( $n = 125$ ) from 2019 were used for specificity testing

108 and validation, and included specimens positive for bacterial and viral infections (lyme, syphilis,  
109 cytomegalovirus [CMV], Epstein-Barr virus [EBV], and other respiratory illnesses) and  
110 autoimmune markers (antinuclear antigen [ANA], and rheumatoid factor).

111

## 112 **Chart review**

113

114 Patient charts were reviewed by at least two people from a four-person team, and  
115 discrepancies were resolved by a third person. Information collected included patient  
116 demographics (sex, age), clinical course (including the estimated date of symptom onset, days  
117 of hospitalization, ICU admission, death), reported symptoms (including fever, cough, shortness  
118 of breath), and comorbidities (including history of smoking, coronary artery disease, chronic  
119 obstructive pulmonary disease [COPD], and diabetes). Given the need to assess for the  
120 serological response within a known timeframe (days from symptom onset), all patients in this  
121 study had symptomatic manifestations of COVID-19. Thus, days from symptom onset was  
122 calculated using the collection date for each serum sample. Where possible, RT-PCR cycle  
123 threshold ( $C_t$ ) values from multiple RT-PCR tests were obtained and assessed alongside the  
124 serological response for the patients included in this study.

125

## 126 **Multiplex SARS-CoV-2 IgG microsphere immunoassay development**

127

128 ***Antigens.*** The immunoassay was constructed using full-length SARS-CoV-2 NP protein (Cat.  
129 Z03480-100), the extracellular domain (ECD) of the S protein (Cat. Z03481-100), and RBD (Cat.

130 Z03483-100), all purchased from GenScript Biotech Corporation, Piscataway, NJ. The S protein  
131 (135 kDa; His tag & FLAG<sup>®</sup> tag) was expressed in *Sf9* insect cells, NP protein (46 kDa; His tag)  
132 was expressed in *E. coli*, and RBD (30 kDa; His Tag) was obtained from expression in human cells.  
133 The SARS-CoV-2 spike ECD and RBD are both reported to ‘bind with human ACE2 in functional  
134 ELISA assay’ by the manufacturer. In addition to the viral antigens, two additional control beads  
135 were included: an internal control bead on region 45 (IC45), and a bead coupled with human  
136 IgG, as described in the next section.

137  
138 **Microsphere-antigen coupling.** Protein coupling to magnetic microsphere beads was  
139 performed according to the manufacturer’s recommendations using the xMAP<sup>®</sup> Antibody  
140 Coupling (AbC) kit (Luminex, Austin, TX). The S protein was coupled at 10 pM, while NP and RBD  
141 were coupled at 100 pM (i.e. equimolar). Beads were also coated with purified human IgG at  
142 0.1 µg/ml (Cat. I2511, Sigma-Aldrich, Inc.). Coupled beads corresponded to bead regions 18 (S),  
143 33 (RBD), 73 (NP), 45 (internal control; IC45), and 66 (human IgG). IgG coupling confirmation  
144 was performed using serial dilutions of biotin-SP-conjugated Fcγ fragment-specific goat α-  
145 human IgG (Cat. 109-065-098, Jackson ImmunoResearch Laboratories, Inc.) and streptavidin-R-  
146 phycerythrin (PE) conjugate (SAPE, Cat. S21388, Thermo Fisher Scientific). SARS-CoV-2 antigen  
147 coupling was confirmed serial dilutions of rabbit-derived antibodies directed against S (Cat.  
148 NB100-56047) and NP (Cat. NB100-56049; Novus Biologicals, LLC, Centennial, CO) and detection  
149 with PE-labelled goat α-rabbit IgG (H+L) cross-adsorbed secondary antibody (Cat. P2771MP,  
150 Thermo Fisher Scientific).

151

152        **Assay procedure.** Serum was diluted to 1:2000 in PBS-TBN (PBS: 0.02%; Tween: 0.1%; BSA:  
153        1%; Azide: 0.05%). The assay was performed by incubating a 5-plex bead mix delivering 2,500  
154        beads for each bead region (IC45, each CoV antigen bead, and the IgG-coupled bead) in a 50  $\mu$ l  
155        volume of PBS-TBN with 50  $\mu$ l of the diluted patient serum for 15 min at 37°C. Beads were  
156        washed twice in 150  $\mu$ l of PBS-TBN with shaking for 2 minutes at 37°C using magnetic  
157        separation. Washed beads were incubated with a mixture of 1:4500 biotin-SP-conjugated Fcy  
158        fragment-specific goat  $\alpha$ -human IgG and 1  $\mu$ g/ml SAPE for 15 min at 37°C. Beads were again  
159        washed twice in 150  $\mu$ l of PBS-TBN with shaking for 2 minutes at 37°C and separated  
160        magnetically. Beads were re-suspended in 100  $\mu$ l of PBS-TBN and analyzed on a FLEXMAP 3D®  
161        instrument (Luminex, Austin, TX), which provides a measurement of the median fluorescence  
162        intensity (MFI) for each analyte on each bead region. For each 96-well plate, patient sera was  
163        tested alongside three PBS-TBN blank wells, an IgG-stripped sera control (Cat. IIGGDS100ML,  
164        Innovative Research, Inc., Novi, MI), and two sera from patients positive for SARS-CoV-2 by RT-  
165        PCR known to be of 'low' and 'high' positivity with respect to SARS-CoV-2 IgG serology (as  
166        determined by the Abbott™ SARS-CoV-2 IgG assay).

167

#### 168        **Comparator SARS-CoV-2 IgG testing**

169

170        Sera used in the validation of the 3Flex assay were tested in parallel according to the package  
171        insert for the FDA Emergency Use Authorization (EUA) SARS-CoV-2 IgG assay on the Abbott™  
172        ARCHITECT™ i2000SR platform. This assay detects the serological response to SARS-CoV-2 NP.

173



174 **Study design and analysis**

175

176 ***Multiplex SARS-CoV-2 IgG microsphere immunoassay validation.*** To establish the required  
177 specificity of the assay, and for interference testing, MFI cut-off values were determined by  
178 testing a total of 125 ‘pre-COVID’ sera. These comprised sera positive for ANA ( $n = 20$ ),  
179 rheumatoid factor ( $n = 10$ ), lyme ( $n = 10$ ), syphilis ( $n = 10$ ), CMV ( $n = 10$ ), EBV ( $n = 10$ ), and non-  
180 SARS-CoV-2 respiratory illnesses ( $n = 55$ ). To examine assay performance, sera ( $n = 125$ ) from  
181 unique patients (i.e.  $n = 125$ ) positive for SARS-CoV-2 nucleic acid and with a known date of  
182 symptom onset were tested. These samples were randomly selected and binned into 5 time  
183 intervals corresponding to  $\leq 5$ , 6 to 10, 11 to 15, 16 to 20, and  $\geq 21$  days from symptom onset.  
184 Results were interpreted qualitatively and concordance was established with respect to the  
185 Abbott™ SARS-CoV-2 IgG assay.

186

187 ***Serological profiling of SARS-CoV-2 infection.*** MFI values for each antigen from all tests ( $n =$   
188 534) were assessed with respect to days from symptom onset. MFI values and corresponding  $C_t$   
189 values were plotted in GraphPad Prism 8 with a smoothed curve (GraphPad Software, San  
190 Diego, CA). Peak values for IgG responses were determined by area under the curve (AUC)  
191 analyses. Because some patients were highly represented in the larger data set, a sub-set of  
192 randomly selected serum specimens was used for MFI comparisons by time, and for  
193 comparisons between select patient populations (i.e. between ICU-admitted and other  
194 patients). Where possible, this sub-set included no more than 1 serum specimen assayed from  
195 a unique patient for each of the 5 time intervals. This allowed 231 serological tests from 140

196 unique patients to be examined. Additionally, 9 extensively sampled patients were tested to  
197 explore interperson (i.e. between patient) IgG responses and the precision of the assay with  
198 repeated measures.

199  
200 **ACE2 inhibition.** As a proxy for the detection of ‘neutralizing’ titers of antibodies to SARS-  
201 CoV-2, the 5-plex bead mix was incubated with soluble recombinant human angiotensin-  
202 converting enzyme 2 (ACE2) (Cat. 0192-30, Adipogen Corporation, San Diego, CA) for 2 minutes  
203 at 37°C with shaking prior to the addition of sera. A doubling dilution series of ACE2 was used  
204 to optimize the concentration needed to produce a ~50% loss of MFI value for sera tested with  
205 and without ACE2. A concentration of 2 µg/ml was selected because MFI values for the spike  
206 RBD were reduced by 50% in the majority of SARS-CoV-2 positive samples tested. ACE2  
207 inhibition was also performed for the 9 extensively characterized patients, but only 1 randomly-  
208 selected serum sample from each of the 5 time intervals was tested if possible. Inhibition  
209 values—given as the residual MFI + ACE2 (%)—are calculated as the percentage of the MFI  
210 value in the presence of ACE2 over the MFI value without ACE2.

211

## 212 **Statistical and graphical analysis**

213

214 Statistical calculations and plotting were performed in Prism 8 (GraphPad Software, San Diego,  
215 CA). Fisher’s exact test was used for patient population comparisons. Unless otherwise  
216 indicated, error bars indicate mean ± standard deviation.

217

218 **RESULTS**

219

220 **Multiplex SARS-CoV-2 IgG microsphere immunoassay validation**

221

222 ***Specificity***

223

224 Specificity was assessed using a set of 213 pre-COVID-19 sera. Serum samples were submitted  
225 to the diagnostic laboratory between 10/1/2019 and 2/1/2020 and included those that were  
226 negative for all analytes tested, as well as samples that were positive for syphilis, CMV,  
227 EBV/Mono, rheumatoid factor, and Lyme disease (**Table 1**). This also included 55 samples taken  
228 from patients within 60 days of an acute respiratory infection. All pre-COVID-19 sera were  
229 designated as 'negative' and formed the basis of cut-off values to establish positive/negative  
230 thresholds used to interpret subsequent testing. The MFI cut-off values for each antigen  
231 exceeded 6 standard deviations of the mean of all negative samples included in this specificity  
232 assessment.

233

234 ***Sensitivity***

235

236 Serum samples from patients with confirmed COVID-19 were categorized by days from  
237 symptom onset ( $\leq 5$ , 6 to 10, 11 to 15, 16 to 20, and  $\geq 21$  days;  $n = 25$  each) and evaluated with  
238 both the 3Flex assay and the Abbott™ ARCHITECT™ SARS-CoV-2 IgG assay (EUA) (**Table 2**). If any  
239 of the 3Flex markers (S, RBD, NP) was positive then the overall interpretation of the assay was

240 positive. With serum obtained  $\leq 5$  days from symptom onset, the 3Flex assay demonstrated a  
241 48.0% (12/25) positivity rate, compared to 32.0% for the ARCHITECT™ SARS-CoV-2 IgG assay  
242 (8/25) (**Table 2**). In 3/4 of the discrepant samples, the 3Flex assay was positive due to the S  
243 target alone, while in 1/4 all three targets were positive (**Table S1**). By 16 to 20 days from  
244 symptom onset the two assays showed comparable positivity rates (92%) which were also  
245 observed for samples obtained  $\geq 21$  days from symptom onset. Although the 3Flex assay is  
246 reported with a positive or negative qualitative result, MFI values increased from an average of  
247 2,305.88 (S), 1,168.40 (RBD), and 3,380.28 (NP) in the  $\leq 5$  days from symptom onset category to  
248 24,859.64 (S), 14,963.76 (RBD), and 20,801.24 (NP) in the  $\geq 21$  days from symptom onset  
249 category (**Table 2**).

250

## 251 **Serological profiling of SARS-CoV-2 infection**

252

### 253 *Characteristics of patient population*

254

255 All 140 unique patients profiled were positive for SARS-CoV-2 nucleic acid by RT-PCR. Of these,  
256 65/140 (46.4%) were women and 75/140 (53.6%) were men (**Table 3**). Sixty-six patients were  
257 admitted to an ICU, and there were 20 mortalities—with 16/20 (80%) being men. Nursing home  
258 residents comprised 37/140 (26.4%) of the tested patients, and the average age of nursing  
259 home residents was 82.6 and 76.0 years for women and men, respectively, compared to 63.4  
260 and 64.1 years for other patient types (inpatient, outpatient) combined. The most frequently  
261 reported symptoms were fever (women: 32/65, 49.2%; men: 51/75, 68.0%) and shortness of

262 breath (women: 34/65, 52.3%; men: 44/75; 58.7%). Gastrointestinal symptoms  
263 (diarrhea/vomiting) were noted for 42/140 (30.0%) of patients (women: 16/65, 24.6%; men:  
264 26/75, 34.7%). Ventilated patients comprised 47/140 (33.6%) of the population (women: 22/65,  
265 33.8%; men: 25/75, 33.3%). The most frequently reported comorbidities included hypertension  
266 (women: 45/65, 69.2%; men: 55/75, 73.3%), a history of smoking (women: 33/65, 50.8%; men:  
267 44/75, 58.7%), and diabetes (women: 23/65, 35.4%; men: 33/75, 44.0%).

268

### 269 ***Serological response to SARS-CoV-2 S, RBD, and NP antigens***

270

271 MFI values corresponding to each antigen were measured for all sera tested ( $n = 534$ ) and  
272 analyzed with respect to days from symptom onset (**Figure 1B, Table 4**). The peak IgG response  
273 to S and RBD antigens occurred on 23.8 days and 23.6 days from symptom onset, respectively.  
274 The peak IgG response to NP was observed at 16.7 days from symptom onset. No test was  
275 qualitatively interpreted as negative >28 days from symptom onset. Although MFIs for all  
276 antigens decreased following the peak response, all seroconverted patients with at least one  
277 test following a positive ( $n = 59$ ) were interpreted as positive on subsequent tests with the  
278 exception of three patients with discrepant findings. Two of these three patients were  
279 mortalities with only limited sera available (i.e. two samples) from a narrow timeframe (<11  
280 days from symptom onset). The serological response of the third discrepant patient (Patient H)  
281 was profiled later (**Figure 2**).

282

283 Overall, 61/534 tests were interpreted as negative and 473/534 tests were interpreted as  
284 positive (**Figure 1C, Data S1**). Twelve of 534 tests were interpreted as positive based on one  
285 antigen MFI value exceeding the threshold for positivity (S: 9/12, 75%; RBD: 3/12, 25%; NP:  
286 0/12, 0.0%). For 57 tests interpreted as positive based on two antigens, the frequency of  
287 antigen pairs were S and RBD (52/57, 91.2%), S and NP (4/57, 7.0%), and RBD and NP (1/57,  
288 1.8%). Single- and double-antigen positives occurred at a median of 5.5 and 8.0 days from  
289 symptom onset, respectively. When allowing for only one test ( $n = 231$ ) per unique patient ( $n =$   
290 140) in each time interval the IgG positivity rate was 53.4% when serum was collected  $\leq 5$  days  
291 from symptom onset, and 96.1% when collected  $\geq 21$  days from symptom onset (**Table 3**).

292  
293  $C_t$  values ( $n = 1,042$ ; 2  $C_t$  values per RT-PCR test) were obtained from RT-PCR detection of SARS-  
294 CoV-2 nucleic acid and compared to the serological response to S, RBD, and NP (**Figure 1D**).  
295 Nucleic acid detection peaked (i.e. lowest average  $C_t$  values) at 4.6 days from symptom onset.  
296 For tests conducted  $< 21$  days from symptom onset 85.2% were positive and had a mean  $C_t$   
297 value of  $26.3 \pm 0.4$  (SEM) (**Figure 1E**). In contrast, 47.8% tests conducted  $\geq 21$  days from  
298 symptom onset were positive and had a mean  $C_t$  value of  $33.4 \pm 0.4$  (SEM).

299

### 300 ***Serological response to SARS-CoV-2 in ICU-admitted patients***

301

302 Patient populations were assessed for differences in MFI values obtained for each SARS-CoV-2  
303 antigen. Higher MFI values were observed for patients aged  $< 65$  (vs.  $\geq 65$ , not shown), and for  
304 those admitted to an ICU (**Figure 1F**). ICU-admitted patients demonstrated significantly higher

305 MFI values for all SARS-CoV-2 antigens at >21 days from symptom onset. ICU-admitted patients  
306 (vs. not-admitted patients) were not appreciably different with respect to age (67.0 years vs.  
307 68.9 years), sex (49.5% female vs. 46.9% female), or histories of smoking, cerebrovascular  
308 disease, coronary artery disease, hypertension, diabetes, or asthma. Patients with histories of  
309 chronic obstructive pulmonary disease (10/66 vs. 3/74,  $P = 0.0383$ , Fisher's exact test) and  
310 obstructive sleep apnea (16/66 vs. 8/74,  $P = 0.0438$ ) were more frequent in the ICU-admitted  
311 patient population than in non-admitted individuals.

312

### 313 ***Inhibition of SARS-CoV-2 antibody binding to S and RBD using ACE2.***

314

315 To assess whether 3Flex could assay for antibodies that neutralize receptor binding, titrated  
316 concentrations (0.0625 – 4  $\mu\text{g}/\text{mL}$ ) of ACE2 were incubated with the 5-plex beadmix prior to  
317 addition of serum (**Figure 1G**). The addition of ACE2 resulted in loss of detection of S and RBD  
318 antibodies, but not NP (**Figure 1H**). The 2  $\mu\text{g}/\text{mL}$  concentration of ACE2 was selected for the  
319 following studies because it was capable of producing a >50% drop in anti-RBD IgG detection.  
320 The residual MFI detected at 2  $\mu\text{g}/\text{mL}$  of ACE2 was  $53.1\% \pm 8.0\%$ ,  $43.5\% \pm 9.72\%$ , and  $98.6\% \pm$   
321  $4.7\%$ , for S, RBD, and NP, respectively (mean  $\pm$  SD).

322

### 323 ***Longitudinal serological response to SARS-CoV-2 in extensively sampled individuals***

324

325 Nine patients (6 women, 3 men) were extensively sampled due to extended hospitalization (all  
326 admitted to an ICU) for COVID-19. The IgG response to SARS-CoV-2 was explored in each of  
327 these, alongside ACE2 inhibition testing (**Figure 2**). The average age of these patients was 67.3

328 years (range: 47.0 to 80.0 years). All of these patients survived their illness. All patients were  
329 ventilated except for Patient I. There was a wide-ranging prevalence of comorbidities and  
330 COVID-19 complications present in this group. These patients had histories notable for  
331 hypertension (9/9), diabetes (7/9), smoking (5/9), kidney disease (7/9). Where available,  $C_t$   
332 values typically decreased or were undetectable following a peak IgG response. Highly variable  
333 (MFI magnitude and kinetics) serological responses were observed for these individuals. In  
334 addition, ACE2 inhibition was demonstrated to varying degrees for each patient, generally with  
335 the greatest 'neutralization' observed for sera tested  $\geq 21$  days from symptom onset.  
336 Neutralization was exclusive to S and RBD, with NP showing no significant inhibition. Despite  
337 evidence of an IgG response, and having tested negative by RT-PCR, 4/9 patients subsequently  
338 tested RT-PCR positive for SARS-CoV-2 on later follow-up testing.

339  
340 **DISCUSSION**

341  
342 In this work we have validated 3Flex as a multiplex fluorescent microsphere immunoassay to  
343 qualitatively assess the IgG response to infection by SARS-CoV-2. We found that this assay  
344 compared favorably with the Abbott™ ARCHITECT™ SARS-CoV-2 IgG assay when testing serum  
345 from a diverse group of individuals with a spectrum of COVID-19 clinical presentations. The  
346 overall profile of the IgG serological response in this collection revealed the initial and peak  
347 responses for each SARS-CoV-2 antigen, timing of the decline in antibody levels, and correlation  
348 with decline in  $C_t$  values (a proxy for viral load).

349



350 Through the early stages of the pandemic, the kinetics of the antibody response to SARS-CoV-2  
351 were described using a variety of methodologies and antigenic targets. Although it is  
352 challenging to directly compare results, the overall picture which emerges from the literature is  
353 that most individuals develop IgM, IgA, and IgG responses at approximately 5-14 days post  
354 symptom onset, though some can take up to 14-28 days<sup>22-25</sup>. In this study, we showed similar  
355 kinetics. Across 534 tests from 140 individuals 48% of those with reported symptom onset  
356 within the past 5 days had detectable IgG, but that number rose to 68% by days 6-10 and 92%  
357 by days 16 to 20. Further, as the pandemic enters its ninth month since the first cases were  
358 identified in the US, some studies have raised concerns over declining levels of SARS-CoV-2  
359 antibodies and the potential ramifications for natural immunity and vaccine response<sup>26</sup>. Among  
360 the nine patients for who we had longitudinal samples, none of the individuals became  
361 negative according to the qualitative interpretation of the assay. In addition, several individuals  
362 who were tested at later time points (>50 days post symptom onset) also demonstrated lower  
363 but still qualitatively positive results (data not shown). These findings are consistent with  
364 serological data from Iceland which indicated that infected individuals remained seropositive  
365 up to 4 months post-infection<sup>27</sup>.

366  
367 Whereas many serological assays for COVID-19 detect a single antigen, this assay incorporates S,  
368 RBD, and NP. This feature may prove useful as it has the added flexibility to potentially  
369 discriminate between the immune responses of infected or vaccinated people (albeit, a use  
370 entirely dependent on the ultimate composition of upcoming SARS-CoV-2 vaccines). This multi-  
371 target approach may also improve the sensitivity of the assay, since a positive result for any of

372 the antigens is interpreted as positive overall. We observed that ~15% of samples were positive  
373 for one antigen but not another, though after 28 days from symptom onset the majority of  
374 patients were positive for all antigens. Here, detection of S and RBD increased the sensitivity of  
375 the 3Flex assay among some of the earlier samples ( $\leq 5$  days from symptom onset) when  
376 compared to the NP-only Abbott™ ARCHITECT™ SARS-CoV-2 IgG assay. Currently, there are  
377 mixed reports concerning antigen specific dynamics of the antibody response, i.e. the relative  
378 timing and duration of responses to one viral antigen versus another. Despite similar findings  
379 reported by Liu et. al.<sup>28</sup>, others have reported greater sensitivity at earlier time points using  
380 single-target NP-based assays.<sup>29</sup>

381  
382 The kinetics of the antibody response were not appreciably different by demographic measures  
383 such as age or sex. Higher MFI values were observed in patients admitted to the ICU as part of  
384 their COVID-19 disease course. This association of higher antibody levels with disease severity  
385 has been reported by others<sup>30,31</sup>, though our data suggested that antigen-specific antibody  
386 kinetics did not differ significantly between the two groups—i.e. in aggregate, peak responses  
387 were observed at the same day from symptom onset.

388  
389 A limitation of this study is its dependence on retrospective and remnant serum samples which  
390 hindered longitudinal sampling. However, for a subset of nine individuals admitted to the ICU,  
391 we had multiple samples that enabled us to track their antibody and viral load data over time.  
392 This allowed us to look beyond the composite data (**in Figure 1B**) for a depiction of individual  
393 responses (**Figure 2**). The longitudinal MFI values of these individual patients suggested a high

394 degree of interperson variation in terms of both kinetics and relative antigen responses. For  
395 most of these nine patients the MFIs for anti-S antibodies were higher. This is despite the fact  
396 that S protein was coupled to beads at only 10% of the molarity of RBD or NP. Thus, anti-S  
397 antibodies potentially comprise a larger proportion of anti-SARS-CoV-2 antibodies. We  
398 observed interperson and time (from symptom onset)-dependent variability in the ability of  
399 soluble ACE2 to block the binding of anti-S and anti-RBD antibodies, an indirect measure of  
400 neutralizing capability. In general, a trend towards greater neutralization over time from  
401 symptom onset was observed. The ability to measure inhibition of signal with ACE2 may prove  
402 useful to measure the effectiveness of, and discriminate between, the immune responses of  
403 infected or vaccinated individuals. However, an important caveat is that it is unclear how *in*  
404 *vitro* 'neutralization' performed in this manner translates to *in vivo* immunity.

405  
406 In summary, the 3Flex assay described here is a versatile and robust method to measure  
407 antibodies to the major antigens of SARS-CoV-2. Beyond the current pandemic, the xMAP  
408 microsphere technology allows for rapid and flexible assay design, as well as straightforward  
409 implementation. This provided a serological platform capable of responding to new and  
410 emerging pathogens.

411

## 412 **FUNDING**

413

414 Funding from the Department of Pathology and Laboratory Medicine, University of Rochester  
415 Medical Center supported this study. This study was also partially supported by the National

416 Institutes of Health Institute of Allergy, Immunology and Infectious Diseases grants R21  
417 AI138500 and R01 AI129518 (MZ, JW) and the University of Rochester Clinical and Translational  
418 Science Award UL1 TR002001 from the National Center for Advancing Translational Sciences of  
419 the National Institutes of Health (MZ). The content is solely the responsibility of the authors and  
420 does not necessarily represent the official views of the National Institutes of Health. None of  
421 the above funders had any role in study design, data collection and analysis, decision to publish,  
422 or preparation of the manuscript. SA is an employee of Luminex Corporation (Austin, TX).  
423 Luminex had no role in study design, data collection and analysis, decision to publish, or  
424 preparation of the manuscript. NDP received support from Luminex Corporation for the  
425 purchase of reagents and supplies.

426

#### 427 **ACKNOWLEDGMENTS**

428

429 We thank the UR Medicine Central Laboratory Clinical Microbiology for specimen collection and  
430 serological testing.

431

#### 432 **CONTRIBUTIONS**

433

434 AC and NP designed the study, selected sera, and performed statistical analyses. SA provided  
435 technical expertise with assay design, reagent selection, and assay optimization. SA, AC, and NP  
436 interpreted criteria for assay validation. MC provided sera from confirmed respiratory disease  
437 infections for interference testing. JW and MZ provided technical expertise and additional

438 reagents. AC, CP, JB, ABC, and NP reviewed patient charts for demographic information and  
439 COVID-19 histories. LB, ZP, AC, NP, and SA performed serological testing. DH and NP provided  
440 laboratory resources. AC and NP analyzed data/results and wrote the first draft of the  
441 manuscript. All authors participated in editing and reviewing the manuscript and approved the  
442 final manuscript. All authors contributed to the article and approved the submitted version.

443 **REFERENCES**

444

445 1. FDA. EUA Authorized Serology Test Performance. [https://www.fda.gov/medical-](https://www.fda.gov/medical-devices/emergency-situations-medical-devices/eua-authorized-serology-test-performance)  
446 [devices/emergency-situations-medical-devices/eua-authorized-serology-test-](https://www.fda.gov/medical-devices/emergency-situations-medical-devices/eua-authorized-serology-test-performance)  
447 [performance](https://www.fda.gov/medical-devices/emergency-situations-medical-devices/eua-authorized-serology-test-performance). Accessed.

448 2. Meyer B, Drosten C, Muller MA. Serological assays for emerging coronaviruses:  
449 challenges and pitfalls. *Virus research*. 2014;194:175-183.

450 3. Qiu M, Shi Y, Guo Z, et al. Antibody responses to individual proteins of SARS coronavirus  
451 and their neutralization activities. *Microbes and infection*. 2005;7(5-6):882-889.

452 4. Tay MZ, Poh CM, Renia L, MacAry PA, Ng LFP. The trinity of COVID-19: immunity,  
453 inflammation and intervention. *Nature reviews Immunology*. 2020.

454 5. Whitman JD, Hiatt J, Mowery CT, et al. Test performance evaluation of SARS-CoV-2  
455 serological assays. *medRxiv*. 2020:2020.2004.2025.20074856.

456 6. Krammer F, Simon V. Serology assays to manage COVID-19. *Science*.  
457 2020;368(6495):1060-1061.

458 7. Du L, He Y, Zhou Y, Liu S, Zheng BJ, Jiang S. The spike protein of SARS-CoV--a target for  
459 vaccine and therapeutic development. *Nature reviews Microbiology*. 2009;7(3):226-236.

460 8. Walls AC, Park YJ, Tortorici MA, Wall A, McGuire AT, Velesler D. Structure, Function, and  
461 Antigenicity of the SARS-CoV-2 Spike Glycoprotein. *Cell*. 2020;181(2):281-292 e286.

- 462 9. Shang J, Ye G, Shi K, et al. Structural basis of receptor recognition by SARS-CoV-2. *Nature*.  
463 2020;581(7807):221-224.
- 464 10. Wrapp D, Wang N, Corbett KS, et al. Cryo-EM structure of the 2019-nCoV spike in the  
465 prefusion conformation. *Science*. 2020;367(6483):1260-1263.
- 466 11. Wang Q, Zhang Y, Wu L, et al. Structural and Functional Basis of SARS-CoV-2 Entry by  
467 Using Human ACE2. *Cell*. 2020;181(4):894-904 e899.
- 468 12. Wu Y, Wang F, Shen C, et al. A noncompeting pair of human neutralizing antibodies  
469 block COVID-19 virus binding to its receptor ACE2. *Science*. 2020.
- 470 13. Tai W, Zhang X, He Y, Jiang S, Du L. Identification of SARS-CoV RBD-targeting monoclonal  
471 antibodies with cross-reactive or neutralizing activity against SARS-CoV-2. *Antiviral*  
472 *research*. 2020;179:104820.
- 473 14. Wrapp D, De Vlieger D, Corbett KS, et al. Structural Basis for Potent Neutralization of  
474 Betacoronaviruses by Single-Domain Camelid Antibodies. *Cell*. 2020.
- 475 15. Wang C, Li W, Drabek D, et al. A human monoclonal antibody blocking SARS-CoV-2  
476 infection. *Nature communications*. 2020;11(1):2251.
- 477 16. Jaimes JA, Andre NM, Chappie JS, Millet JK, Whittaker GR. Phylogenetic Analysis and  
478 Structural Modeling of SARS-CoV-2 Spike Protein Reveals an Evolutionary Distinct and  
479 Proteolytically Sensitive Activation Loop. *Journal of molecular biology*.  
480 2020;432(10):3309-3325.

- 481 17. Che XY, Hao W, Wang Y, et al. Nucleocapsid protein as early diagnostic marker for SARS.  
482 *Emerging infectious diseases*. 2004;10(11):1947-1949.
- 483 18. Ahmed SF, Quadeer AA, McKay MR. Preliminary Identification of Potential Vaccine  
484 Targets for the COVID-19 Coronavirus (SARS-CoV-2) Based on SARS-CoV Immunological  
485 Studies. *Viruses*. 2020;12(3).
- 486 19. Liu SJ, Leng CH, Lien SP, et al. Immunological characterizations of the nucleocapsid  
487 protein based SARS vaccine candidates. *Vaccine*. 2006;24(16):3100-3108.
- 488 20. Surjit M, Lal SK. The SARS-CoV nucleocapsid protein: a protein with multifarious  
489 activities. *Infection, genetics and evolution : journal of molecular epidemiology and  
490 evolutionary genetics in infectious diseases*. 2008;8(4):397-405.
- 491 21. Zeng W, Liu G, Ma H, et al. Biochemical characterization of SARS-CoV-2 nucleocapsid  
492 protein. *Biochemical and biophysical research communications*. 2020.
- 493 22. Zhang G, Nie S, Zhang Z, Zhang Z. Longitudinal Change of Severe Acute Respiratory  
494 Syndrome Coronavirus 2 Antibodies in Patients with Coronavirus Disease 2019. *The  
495 Journal of infectious diseases*. 2020;222(2):183-188.
- 496 23. Guo L, Ren L, Yang S, et al. Profiling Early Humoral Response to Diagnose Novel  
497 Coronavirus Disease (COVID-19). *Clinical infectious diseases : an official publication of  
498 the Infectious Diseases Society of America*. 2020.



- 499 24. Xiang F, Wang X, He X, et al. Antibody Detection and Dynamic Characteristics in Patients  
500 with COVID-19. *Clinical infectious diseases : an official publication of the Infectious*  
501 *Diseases Society of America*. 2020.
- 502 25. Zhao J, Yuan Q, Wang H, et al. Antibody responses to SARS-CoV-2 in patients of novel  
503 coronavirus disease 2019. *Clinical infectious diseases : an official publication of the*  
504 *Infectious Diseases Society of America*. 2020.
- 505 26. Long QX, Tang XJ, Shi QL, et al. Clinical and immunological assessment of asymptomatic  
506 SARS-CoV-2 infections. *Nature medicine*. 2020.
- 507 27. Gudbjartsson DF, Norddahl GL, Melsted P, et al. Humoral Immune Response to SARS-  
508 CoV-2 in Iceland. *The New England journal of medicine*. 2020.
- 509 28. Liu W, Liu L, Kou G, et al. Evaluation of Nucleocapsid and Spike Protein-based ELISAs for  
510 detecting antibodies against SARS-CoV-2. *Journal of clinical microbiology*. 2020.
- 511 29. Burbelo PD, Riedo FX, Morishima C, et al. Detection of Nucleocapsid Antibody to SARS-  
512 CoV-2 is More Sensitive than Antibody to Spike Protein in COVID-19 Patients. *The*  
513 *Journal of infectious diseases*. 2020.
- 514 30. Okba NMA, Muller MA, Li W, et al. Severe Acute Respiratory Syndrome Coronavirus 2-  
515 Specific Antibody Responses in Coronavirus Disease 2019 Patients. *Emerging infectious*  
516 *diseases*. 2020;26(7).

517 31. Grzelak L, Temmam S, Planchais C, et al. A comparison of four serological assays for  
518 detecting anti-SARS-CoV-2 antibodies in human serum samples from different  
519 populations. *Science translational medicine*. 2020;12(559).  
520

521 **TABLES**

522

523 **Table 1: 3Flex MFI<sup>a</sup> values of negative pre-COVID-19 serum and serum positive for potential**  
 524 **interfering etiologies.**

| Sample group                    | <i>n</i> | Spike MFI Average<br>(95% CI) | RBD MFI Average<br>(95% CI) | Nucleocapsid MFI Average<br>(95% CI) |
|---------------------------------|----------|-------------------------------|-----------------------------|--------------------------------------|
| Pre-COVID-19                    | 93       | 140<br>(127-153)              | 91<br>(88-93)               | 224<br>(159-288)                     |
| Lyme                            | 10       | 148<br>(138-157)              | 97<br>(92-102)              | 564<br>(58-1,069)                    |
| Syphilis                        | 10       | 165<br>(148-182)              | 105<br>(98-113)             | 214<br>(3-284)                       |
| CMV                             | 10       | 180<br>(113-247)              | 96<br>(91-102)              | 230<br>(99-361)                      |
| EBV/Mono                        | 10       | 187<br>(134-241)              | 109<br>(102-117)            | 265<br>(165-365)                     |
| Acute viral respiratory illness | 55       | 136<br>(121-151)              | 91<br>(90-93)               | 165<br>(107-223)                     |
| ANA                             | 20       | 178<br>(153-202)              | 101<br>(97-104)             | 348<br>(162-535)                     |
| Rheumatoid Factor               | 10       | 149<br>(134-164)              | 99<br>(94-104)              | 476<br>(80-873)                      |

525 <sup>a</sup> MFI: median fluorescent intensity.

526 Abbreviations: CMV, cytomegalovirus; EBV/Mono, Epstein-Barr virus mononucleosis; ANA, anti-  
 527 nuclear antigen.

528 **Table 2: Percent positivity and average MFI<sup>a</sup> values of 3Flex vs. Abbott™ ARCHITECT™ SARS-**  
 529 **CoV-2 IgG serological tests by days from symptom onset for 125 unique patients.**

| Days from symptom onset | Abbott™ ARCHITECT™ SARS-CoV-2 IgG |                           | SARS2-MP                |                               |                             |                                      |
|-------------------------|-----------------------------------|---------------------------|-------------------------|-------------------------------|-----------------------------|--------------------------------------|
|                         | Total tests<br>n (%)              | Positive tests<br>n (%)   | Positive tests<br>n (%) | Spike MFI<br>Average (95% CI) | RBD MFI<br>Average (95% CI) | Nucleocapsid MFI<br>Average (95% CI) |
| ≤5                      | 25<br>(100.0)                     | 8<br>(32.0)               | 12<br>(48.0)            | 4,637<br>(719-8,554)          | 2,337<br>(355-4,319)        | 6,578<br>(2,823-10,333)              |
| 6 to 10                 | 25<br>(100.0)                     | 13<br>(54.2) <sup>a</sup> | 17<br>(68.0)            | 11,688<br>(5,053-18,324)      | 6,283<br>(1,700-10,867)     | 14,779<br>(6,111-23,477)             |
| 11 to 15                | 25<br>(100.0)                     | 20<br>(80.0)              | 21<br>(84.0)            | 24,654<br>(15,358-33,950)     | 14,378<br>(6,202-22,554)    | 19,592<br>(12,242-26,941)            |
| 16 to 20                | 25<br>(100.0)                     | 22<br>(91.6) <sup>a</sup> | 23<br>(92.0)            | 23,202<br>(17,044-29,359)     | 14,222<br>(9,185-19,258)    | 25,534<br>(18,859-32,209)            |
| ≥21                     | 25<br>(100.0)                     | 23<br>(92.0)              | 23<br>(92.0)            | 27,010<br>(20,231-33,789)     | 16,258<br>(10,727-21,789)   | 22,591<br>(13,629-31,554)            |

530 <sup>a</sup> MFI: median fluorescent intensity.

531 <sup>b</sup> 1 test had insufficient volume for the Abbott™ ARCHITECT™ SARS-CoV-2 IgG assay.

532 **Table 3: Demographics, symptoms, and co-morbidities of 140 patients positive for SARS-CoV-**  
 533 **2 by RT-PCR and tested for IgG in this study.**

| <b>Demographics</b>                      | <b>n</b>   | <b>(%)</b>   |
|------------------------------------------|------------|--------------|
| Female                                   | 65         | (46.4)       |
| Male                                     | 75         | (53.6)       |
| Nursing home residents                   | 37         | (26.4)       |
| Age (average) in years                   | 68.0       |              |
| <b>Symptoms</b>                          |            |              |
| Fever                                    | 83         | (59.3)       |
| Cough                                    | 64         | (45.7)       |
| Headache                                 | 12         | (8.6)        |
| Sore throat                              | 10         | (7.1)        |
| Shortness of breath                      | 78         | (55.7)       |
| Altered mental status                    | 45         | (32.1)       |
| Malaise                                  | 36         | (25.7)       |
| Diarrhea / Vomiting                      | 42         | (30.0)       |
| <b>Course of disease / Complications</b> |            |              |
| Days of hospitalization (average)        | 13.8       |              |
| ICU admission                            | 66         | (47.1)       |
| Low oxygen saturation                    | 75         | (53.6)       |
| Ventilation                              | 47         | (33.6)       |
| Septic shock / vasopressor               | 28         | (20.0)       |
| Bacterial pneumonia                      | 28         | (20.0)       |
| Deceased                                 | 20         | (14.3)       |
| <b>Comorbidities</b>                     |            |              |
| Asthma                                   | 15         | (10.7)       |
| COPD                                     | 13         | (9.3)        |
| Diabetes                                 | 56         | (40.0)       |
| Hypertension                             | 100        | (71.4)       |
| Obstructive sleep apnea                  | 24         | (17.1)       |
| Coronary artery disease                  | 19         | (13.6)       |
| Cerebrovascular disease                  | 25         | (17.9)       |
| Immunodeficiency / Immunosuppression     | 11         | (7.9)        |
| History of smoking                       | 77         | (55.0)       |
| <b>Total</b>                             | <b>140</b> | <b>(100)</b> |

534

535 **Table 4: Percent positivity and average MFI<sup>a</sup> values of all 3Flex serological tests by days from**  
 536 **symptom onset for all patients tested<sup>b</sup>**

| Days from symptom onset | Total tests<br>n (%) | Negative tests<br>n (%) | Positive tests<br>n (%) | Spike MFI<br>Average (95% CI) | RBD MFI<br>Average (95% CI) | Nucleocapsid MFI<br>Average (95% CI) |
|-------------------------|----------------------|-------------------------|-------------------------|-------------------------------|-----------------------------|--------------------------------------|
| ≤5                      | 67<br>(100.0)        | 33<br>(49.3)            | 34<br>(50.7)            | 11,565<br>(5,718-17,412)      | 8,723<br>(3,295-14,150)     | 13,794<br>(8,721-18,866)             |
| 6 to 10                 | 106<br>(100.0)       | 21<br>(19.3)            | 85<br>(80.2)            | 23,051<br>(18,955-27,147)     | 16,172<br>(12,323-20,023)   | 27,028<br>(21,749-32,308)            |
| 11 to 15                | 85<br>(100.0)        | 9<br>(10.6)             | 76<br>(89.4)            | 29,545<br>(25,190-33,901)     | 19,876<br>(15,534-24,217)   | 28,598<br>(23,978-33,218)            |
| 16 to 20                | 88<br>(100.0)        | 5<br>(5.7)              | 83<br>(94.3)            | 31,006<br>(26,406-35,606)     | 20,694<br>(16,539-24,848)   | 28,474<br>(24,134-32,814)            |
| ≥21                     | 188<br>(100.0)       | 5<br>(2.7)              | 183<br>(97.3)           | 31,751<br>(28,774-34,727)     | 19,516<br>(16,889-22,142)   | 20,459<br>(17,574-23,343)            |

537 <sup>a</sup> MFI: median fluorescent intensity.

538 <sup>b</sup> Includes multiple serological tests from non-unique patients.

539 **FIGURE LEGENDS**

540

541 **Figure 1**

542 **Utility of the 3Flex multiplex microsphere-based immunological assay for SARS-CoV-2**

543 **diagnostics and immunological research. (A)** Simplified workflow and illustration of the 3Flex

544 assay. **(B)** Total composite profile of IgG immune reactivity in SARS-CoV-2 -infected patients by

545 days from symptom. Data represented are median MFI values for each viral antigen (Spike, RBD,

546 and NP) from 534 serological tests (1,602 data points) of 140 patients. Tests shown are those

547 occurring between -5 to 45 days from symptom onset and includes tests deemed qualitatively

548 negative or positive. Data points outside the axis limits (273) are not shown. Fitted curve lines

549 are smoothed splines with 4 knots. **(C)** Histogram showing number of serological tests by day

550 from symptom onset and their qualitative positivity. **(D)** Composite profile of cycle threshold ( $C_t$ )

551 values from the same SARS-CoV-2 infected patients overlaid with the serological profile.  $C_t$

552 values are plotted in reverse on the right axis (purple). A total of 521 RT-PCR tests are depicted

553 and each has 2 data points plotted. Undetected targets or negative tests were assigned a  $C_t$  of

554 45. Fitted curve lines are smoothed splines with 4 knots. **(E)** Histogram showing number of RT-

555 PCR (molecular) tests by day from symptom onset and their qualitative positivity. **(F)** Violin plot

556 comparison of median MFI values for patients admitted to the ICU ( $n = 66$ ) vs. all other SARS-

557 CoV-2-infected patients ( $n = 74$ ). Data shown are for serological tests interpreted as positive

558 only. Only 1 test for each unique patient was randomly selected for inclusion in each time

559 interval bin ( $\leq 5$ , 6 to 10, 11 to 15, 16 to 20, and  $\geq 21$  days from symptom onset). Differences

560 between violin plots are calculated using an unpaired  $t$  test: \*,  $P \leq 0.05$ ; \*\*,  $P \leq 0.01$ . **(G)** Assay

561 schematic for ACE2 inhibition of antibody binding to the SARS-CoV-2 S and RBD antigens. **(H)**  
562 Addition of ACE2 inhibits detection and binding of antibodies to S and RBD, but not to NP.  
563 Percent residual (i.e. compared to no ACE2 added) mean MFI values with standard deviation  
564 are shown at increasing ACE2 concentrations (x-axis log<sub>2</sub> scale). Sera tested ( $n = 11$ ) were from  
565 patients positive for SARS-CoV-2 IgG.

566

567 **Figure 2**

568 **Interperson variation in longitudinal IgG immunological responses to SARS-CoV-2 in**  
569 **intensively hospitalized patients.** Longitudinal serum samples from ICU-admitted patients ( $n =$   
570 9) were tested for IgG to SARS-CoV-2 S, RBD, and NP antigens. Curve lines were fitted for each  
571 antigen (smoothed splines with 4 knots). Corresponding RT-PCR  $C_t$  values were plotted in  
572 reverse on the right axis (purple) and connected by straight lines through the mean  $C_t$  value of  
573 each test. A single sample was randomly selected for each time interval bin ( $\leq 5$ , 6 to 10, 11 to  
574 15, 16 to 20, and  $\geq 21$  days from symptom onset) to assay for ACE2 inhibition. Values shown  
575 above each plot are residual MFI values (in percent) for each antigen (percentage of MFI  
576 detected with ACE2 addition compared to a no-ACE2 control).



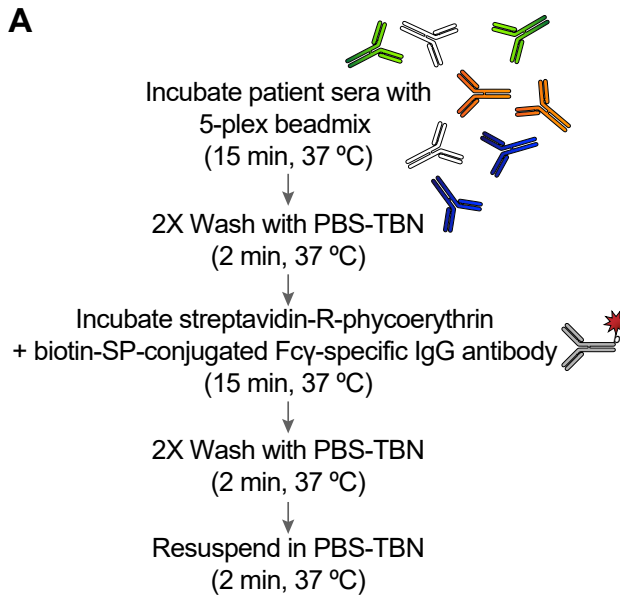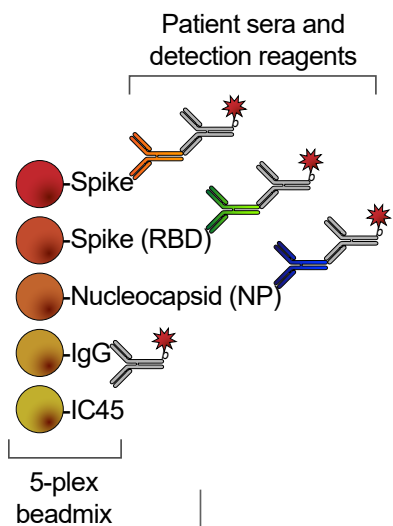

Read plate on FLEXMAP 3D and obtain median fluorescent intensity (MFI) values

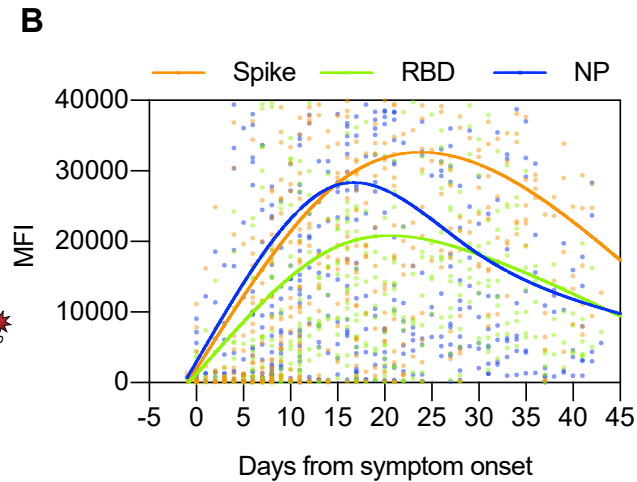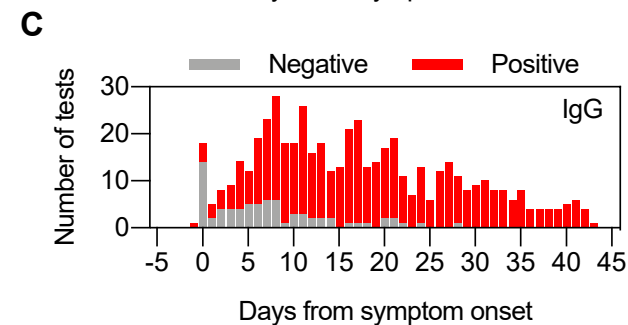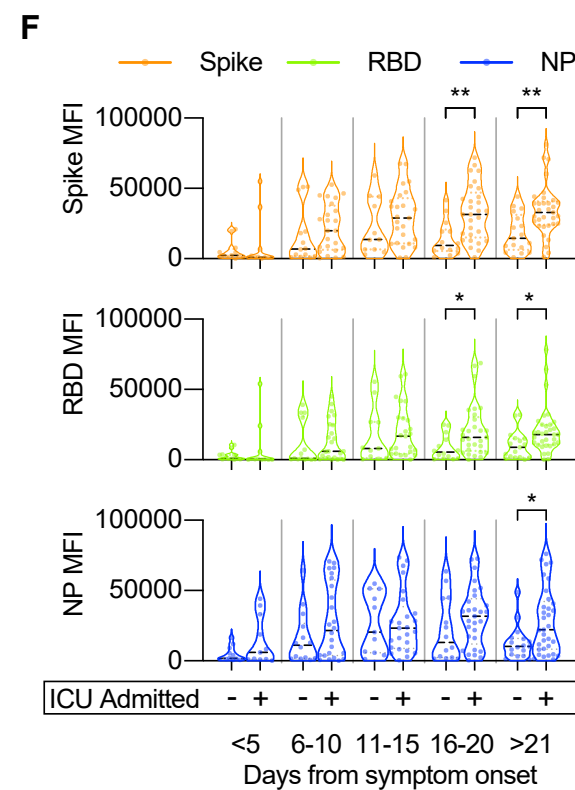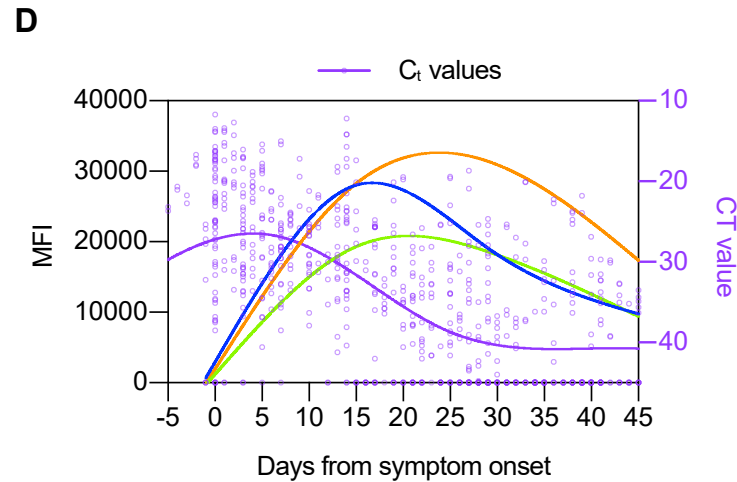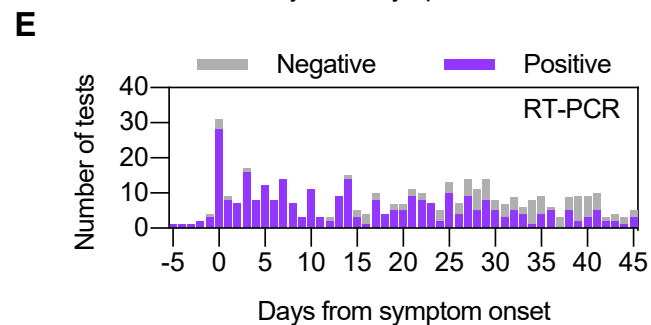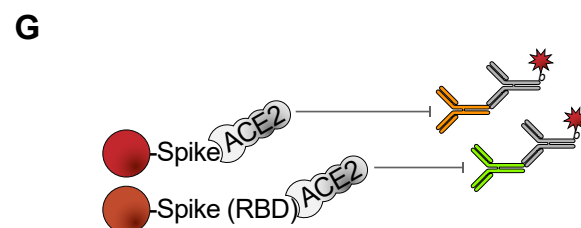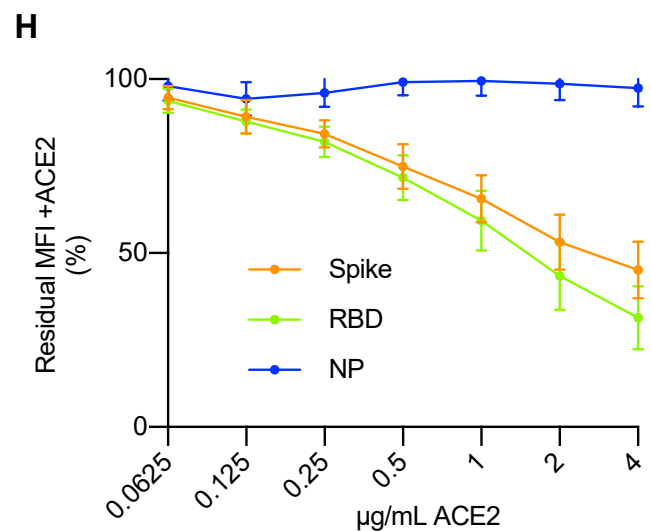

Patient A

| Positivity | NEG  | POS  | POS  | POS  | POS  |
|------------|------|------|------|------|------|
| Spike      | 73.3 | 40.9 | 48.6 | 45.6 | 49.3 |
| RBD        | 83.4 | 33.7 | 38.2 | 38.1 | 38.9 |
| NP         | 100  | 98.1 | 96.1 | 100  | 96.5 |

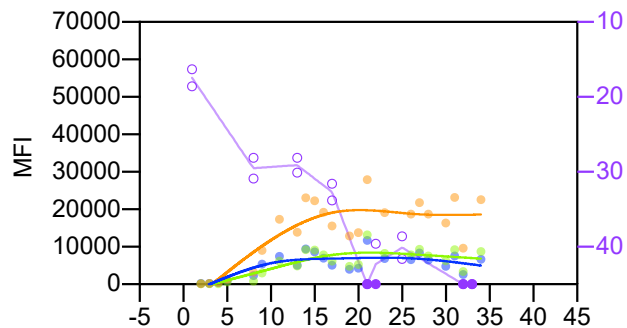

Patient B

| Positivity | POS  | POS  | POS  | POS  |
|------------|------|------|------|------|
| Spike      | 58.7 | 73.8 | 66.1 | 63.2 |
| RBD        | 31.5 | 45.2 | 53.3 | 48.7 |
| NP         | 98.0 | 100  | 92.7 | 96.5 |

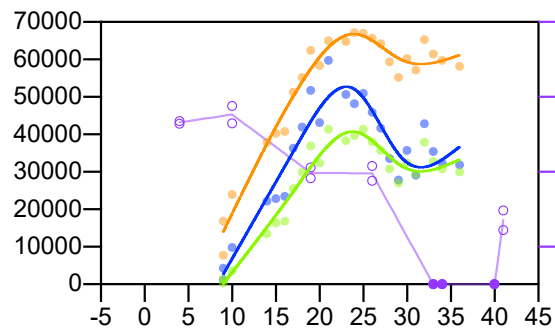

Patient C

| Positivity | POS  | POS  | POS  | POS  | POS  |
|------------|------|------|------|------|------|
| Spike      | 42.8 | 61.7 | 74.7 | 75.4 | 68.9 |
| RBD        | 40.6 | 60.8 | 75.3 | 79.4 | 74.7 |
| NP         | 95.0 | 91.5 | 94.4 | 100  | 99.6 |

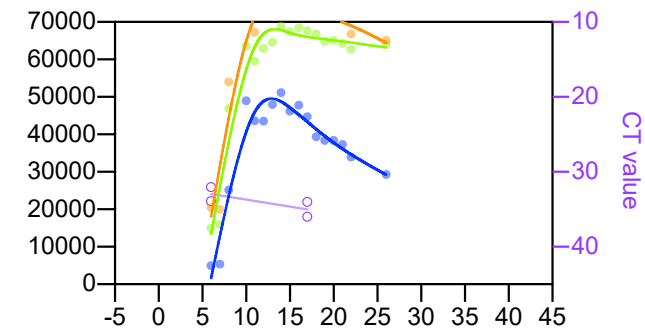

Patient D

| Positivity | NEG  | POS  | POS  |
|------------|------|------|------|
| Spike      | 70.7 | 51.8 | 75.4 |
| RBD        | 87.7 | 57.9 | 69.7 |
| NP         | 97.6 | 95.9 | 97.2 |

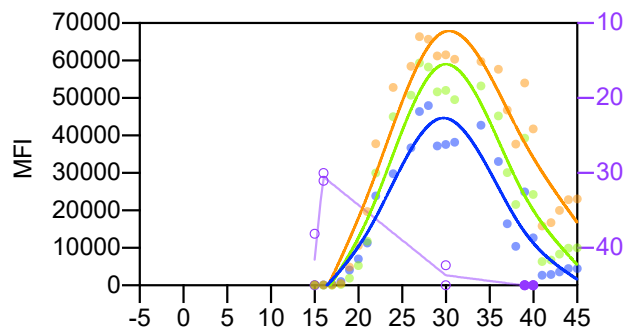

Patient E

| Positivity | POS  | POS  | POS  | POS  |
|------------|------|------|------|------|
| Spike      | 56.6 | 54.1 | 52.3 | 49.4 |
| RBD        | 47.3 | 48.3 | 44.9 | 43.7 |
| NP         | 100  | 96.6 | 92.0 | 100  |

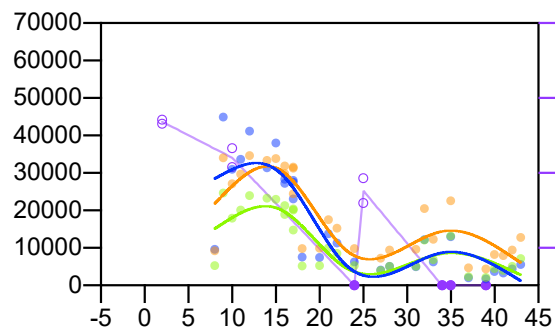

Patient F

| Positivity | NEG  | POS  | POS  | POS  | POS  |
|------------|------|------|------|------|------|
| Spike      | 84.8 | 43.2 | 48.8 | 48.9 | 47.9 |
| RBD        | 100  | 28.7 | 35.1 | 38.2 | 39.7 |
| NP         | 97.0 | 100  | 99.2 | 99.8 | 100  |

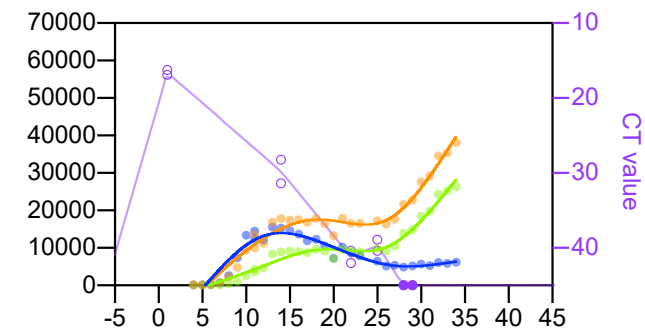

Patient G

| Positivity | NEG  | POS  | POS  | POS  |
|------------|------|------|------|------|
| Spike      | 66.6 | 48.7 | 56.3 | 55.5 |
| RBD        | 83.2 | 38.2 | 51.0 | 46.9 |
| NP         | 96.0 | 97.8 | 100  | 100  |

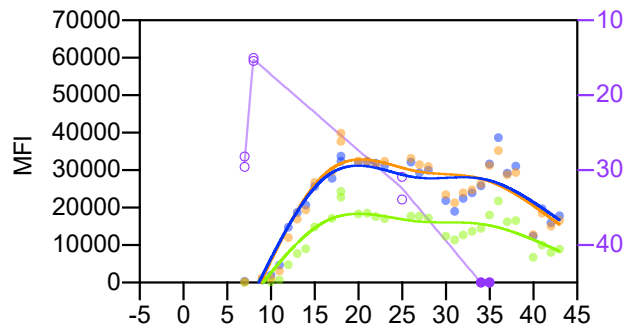

Days from symptom onset

Patient H

| Positivity | NEG  | NEG  | NEG  | POS  | POS  |
|------------|------|------|------|------|------|
| Spike      | 55.3 | 66.6 | 59.5 | 46.7 | 59.0 |
| RBD        | 74.0 | 98.2 | 79.9 | 46.7 | 36.6 |
| NP         | 83.8 | 98.2 | 93.7 | 98.6 | 90.7 |

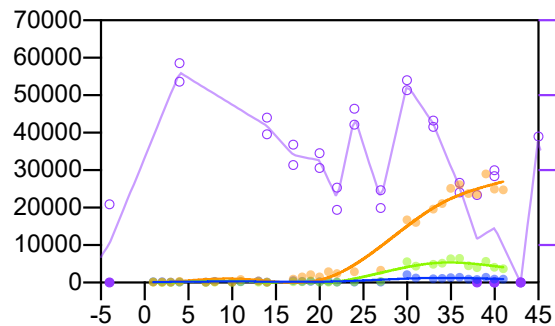

Days from symptom onset

Patient I

| Positivity | POS  | POS  | POS  | POS  | POS  |
|------------|------|------|------|------|------|
| Spike      | 37.9 | 53.2 | 52.4 | 52.8 | 52.4 |
| RBD        | 46.9 | 39.6 | 36.4 | 38.4 | 40.3 |
| NP         | 99.3 | 100  | 99.9 | 100  | 99.8 |

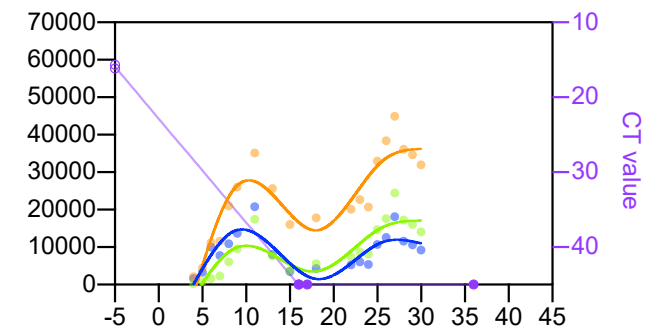

Days from symptom onset
